# Supplementary material for: Dynamic metabonomic and microbiological response of rats to lincomycin exposure: an integrated microbiology and metabonomics analysis
Source: Royal Society of Chemistry journal article supplement (doi:10.1039/c5ra10626e), 2015-01-01
Supplement: c5ra10626e1.pdf [file c5ra10626e1.pdf]

## Supplementary Information

### Dynamic Metabonomic and Microbiological Response of Rats to Lincomycin

### Exposure: An Integrated Microbiology and Metabonomics Analysis

Manna Lin,<sup>#ab</sup> Zhiyong Xie,<sup>#b</sup> Yuting Zhou,<sup>b</sup> Yemeng Li,<sup>b</sup> Jian Ren,<sup>c</sup> Xuan-xian

Peng,<sup>c</sup> Meicun Yao,<sup>b</sup> Zhongzhou Yang<sup>b</sup> and Qiongfeng Liao<sup>\*a</sup>

<sup>a</sup>*School of Chinese Materia Medica, Guangzhou University of Chinese Medicine, Guangzhou, 510006, P. R. China*

<sup>b</sup>*School of Pharmaceutical Sciences, Sun Yat-sen University, Guangzhou, 510006, P. R. China*

<sup>c</sup>*School of Life Sciences, Sun Yat-sen University, Guangzhou, 510006, P. R. China*

\*Corresponding author: Qiongfeng Liao

Tel. +86 20 3935 8081

Fax +86 20 3935 8050

*E-mail* address: liaoqf2075@yahoo.com

<sup>#</sup> These authors contributed equally to this work.

## 15 **Supplementary information text:**

## 16 **Materials and methods**

### 17 **Chemicals**

18 Lincomycin (LM) was purchased from Dalian Meilun Biotech Co., LTD (Shandong, China) and  
19 authorized for experimental use by School of Pharmaceutical Sciences, Sun Yat-sen University  
20 (Guangzhou, China). D<sub>2</sub>O (with 0.05% sodium 3-trimethylsilyl-(2, 2, 3, 3-*d*<sub>4</sub>)-1-propionate, TSP)  
21 was obtained from Qingdao Teng Long Technology Co., LTD (Qingdao, China). Phosphate buffer  
22 was prepared with K<sub>2</sub>HPO<sub>4</sub>·3H<sub>2</sub>O and NaH<sub>2</sub>PO<sub>4</sub>·2H<sub>2</sub>O essentially refer to the previously  
23 reported.<sup>23</sup> TIANamp tool DNA Kit and *Escherichia coli* DH5α were obtained from Tiangen  
24 Biotech Co., LTD (Beijing, China). All the primers and Taq PCR Master Mix (2×, blue dye) were  
25 purchased from Sangon Biotech Co., LTD (Shanghai, China). p GEM-T Easy Vector was  
26 purchased from Promega Biotech Co., LTD (Beijing, China).

### 27 **Sample preparation and NMR spectroscopy**

28 A previously optimized method was adopted for preparation of urine samples.<sup>23</sup> Briefly,  
29 samples were removed from −80 °C storage and thawed at room temperature. Urine samples were  
30 prepared by blending 550 μL of urine with 55 μL of a phosphate buffer (K<sub>2</sub>HPO<sub>4</sub>/NaH<sub>2</sub>PO<sub>4</sub>, 1.5  
31 M, pH 7.4, 100% D<sub>2</sub>O) containing 0.05% TSP for chemical shift reference ( $\delta$  0.00). Faecal  
32 samples were extracted as previously optimized<sup>24</sup> with slight modifications. In brief, samples (100  
33 ± 2 mg) were sonicated twice with 800 μL phosphate buffer (0.1 M, K<sub>2</sub>HPO<sub>4</sub>/NaH<sub>2</sub>PO<sub>4</sub>, pH 7.4)

34 containing 0.005% TSP, 10% D<sub>2</sub>O and 0.01% NaN<sub>3</sub>. After 10 min of centrifugation (4 °C, 16000  
35 g), 500 µL samples of supernatant was pipetted into 5 mm NMR capillary tubes for NMR  
36 analysis.

### 37 **Microbiological analysis of faecal samples**

38 Briefly, the selected bands were excised from the DGGE gels and their fragments were  
39 reamplified with primers 357f and 518r. Following verification by agarose gel electrophoresis, the  
40 PCR products were ligated with p GEM-T Easy Vector and then transformed into *Escherichia coli*  
41 DH5α. The inserted DNA of positive clones was amplified using the nest approach. The primers  
42 for the first PCR were T7 and SP6, and for the second, they were 357f\_GC and 518r. The  
43 resulting PCR products, which confirmed to the same position as the original band in DGGE gels  
44 were sequenced (Sangon Biotech, Shanghai, China).

### 45 **Supplementary figures and tables:**

46 **Figure S1 Overview of experimental workflow.** The experimental workflow combined urinary  
47 and faecal metabolic profiling and 16S rRNA gene PCR-DGGE profiling to investigate the impact  
48 of lincomycin exposure on the metabolites and gut microbiome.

49 **Figure S2** Changes of body weight and body weight ratio of rats in lincomycin group (LIN)  
50 compared with control group (CTR). A, body weight of rats in the whole experimental period; B,  
51 increased body weight ratio on days 5, 14 and 21. The data are expressed as the means ± SD (\*  $p$   
52 < 0.05, \*\*  $p$  < 0.005).

**Figure S3** Trajectories of different datasets (A) and (B) are score plots of PCA derived from urinary (A) and faecal (B) metabonomic data for the control group (CTR, red) and lincomycin group (LIN, blue) across the time course of pre-dose (day -1), lincomycin dose (day 5, day 14) and recovery period (day 21). Each dot in the plots represents mean values of the scores from the first and second principal components at a time point. PCA scores of urinary (C) and faecal (D) metabolic profiles show similar time-dependent changes of the lincomycin at different time points.

**Figure S4** Permutation test plots (200 permutations) for urine at day 5 (A1), day 14 (A2) and day 21 (A3).

**Figure S5** Permutation test plots (200 permutations) for faeces at day 5 (A1), day 14 (A2) and day 21 (A3).

**Figure S6** OPLS-DA score plots (left panel) and PCR-DGGE profiles (right panel) derived from the 16S rRNA gene *Bacteroides* spp. (A) and 16S rRNA gene *Clostridium leptum* (B), indicating the discrimination between control group (CTR, black) and lincomycin group (LIN, red) rats at day 14.

**Table S1** The primers of V3 region, *Bacteroides* spp. and *Clostridium leptum*.

**Table S2** PCR amplification system of V3 region, *Bacteroides* spp. and *Clostridium leptum*.

**Table S3** PCR program and DGGE analysis condition of V3 region, *Bacteroides* spp. and *Clostridium leptum*.

**Table S4** <sup>1</sup>H NMR data for metabolites in rat urine and faeces.

**Table S5** Significant changes in urine metabolites of the LIN at day 5, day 14 and day 21.

**Table S6** Significant changes in faecal metabolites of the LIN at day 5, day 14 and day 21.

**Table S7** Correlation coefficients between the bacterial species from bands and relative concentration of fecal metabolites obtained from samples collected at day 14 post-treatment.





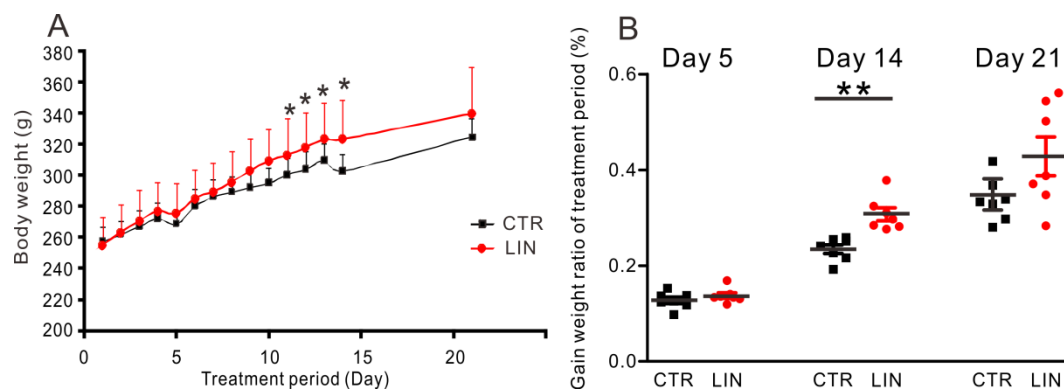

**Figure S2** Changes of body weight and body weight ratio of rats in lincomycin group (LIN) compared with control group (CTR). A, body weight of rats in the whole experimental period; B, increased body weight ratio on days 5, 14 and 21. The data are expressed as the means  $\pm$  SD (\*  $p < 0.05$ , \*\*  $p < 0.005$ ).

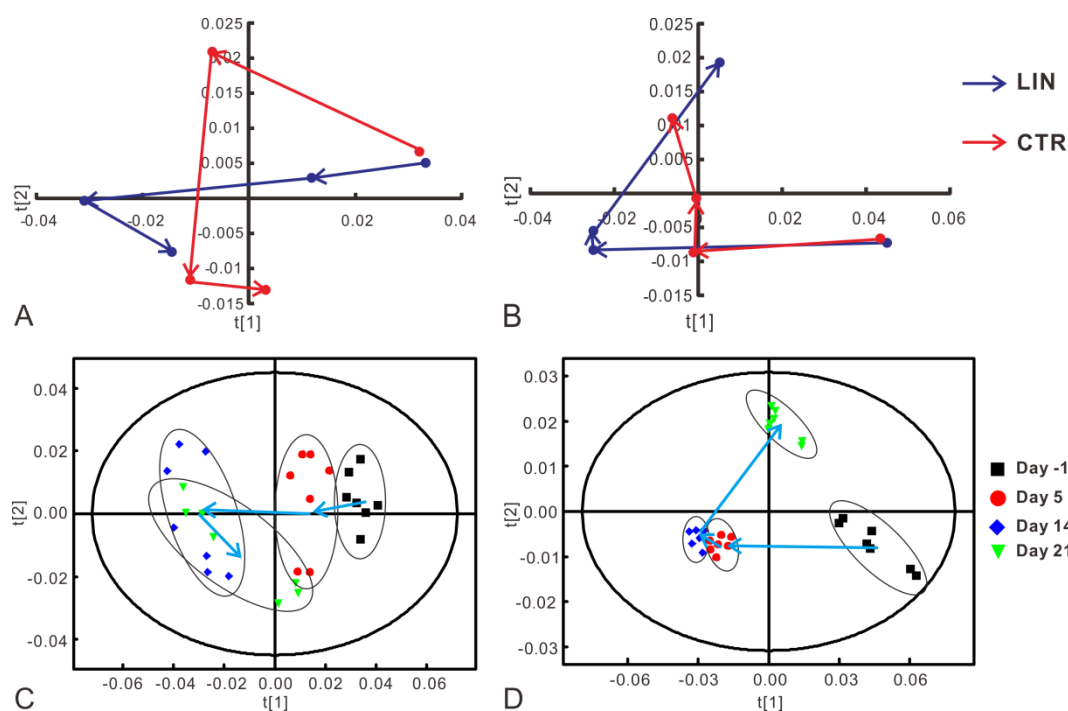

**Figure S3** Trajectories of different datasets (A) and (B) are score plots of PCA derived from urinary (A) and faecal (B) metabonomic data for the control group (CTR, red) and lincomycin group (LIN, blue) across the time course of pre-dose (day -1), lincomycin dose (day 5, day 14) and recovery period (day 21). Each dot in the plots represents mean values of the scores from the first

and second principal components at a time point. PCA scores of urinary (C) and faecal (D) metabolic profiles show similar time-dependent changes of the lincomycin at different time points.

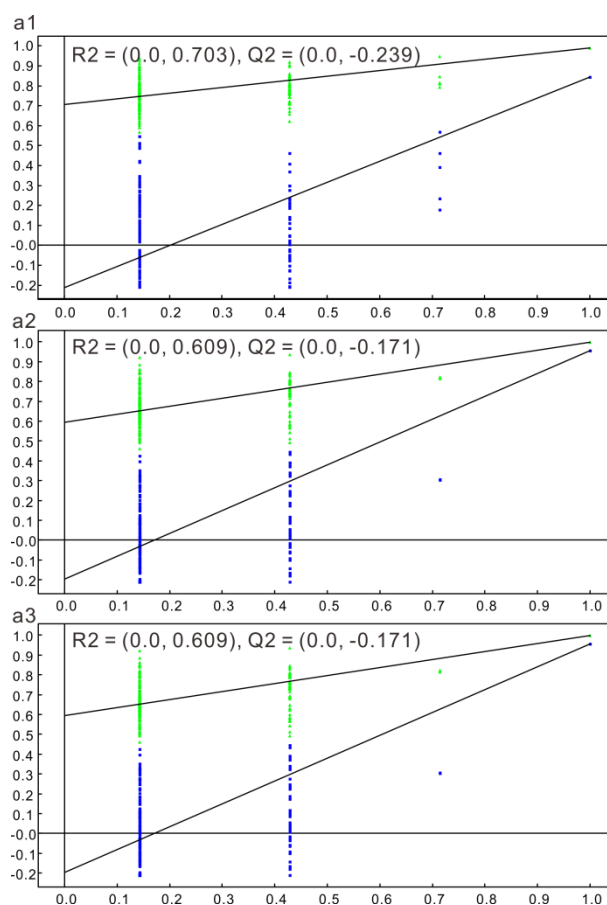

**Figure S4** Permutation test plots (200 permutations) for urine at day 5 (A1), day 14 (A2) and day 21 (A3).

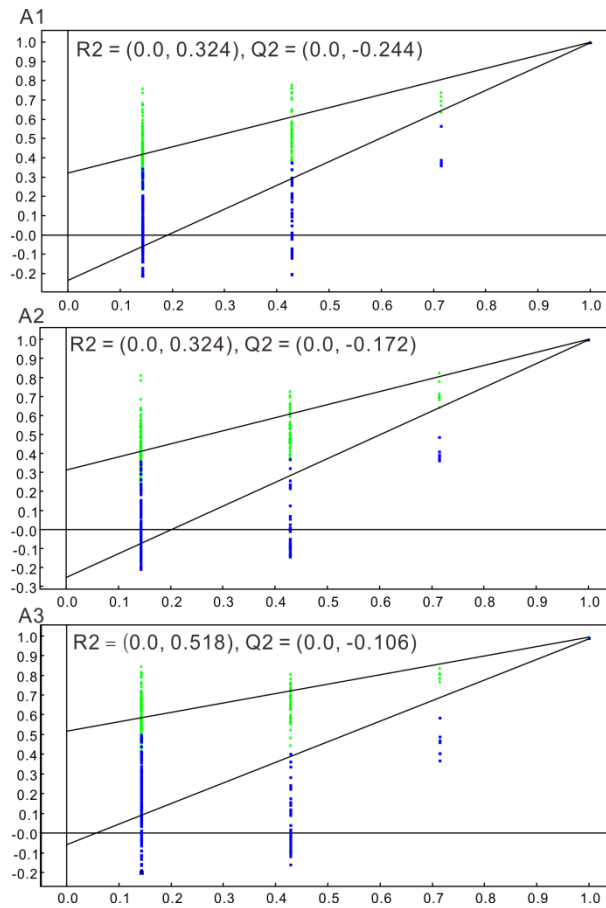

**Figure S5** Permutation test plots (200 permutations) for faeces at day 5 (A1), day 14 (A2) and day 21 (A3).

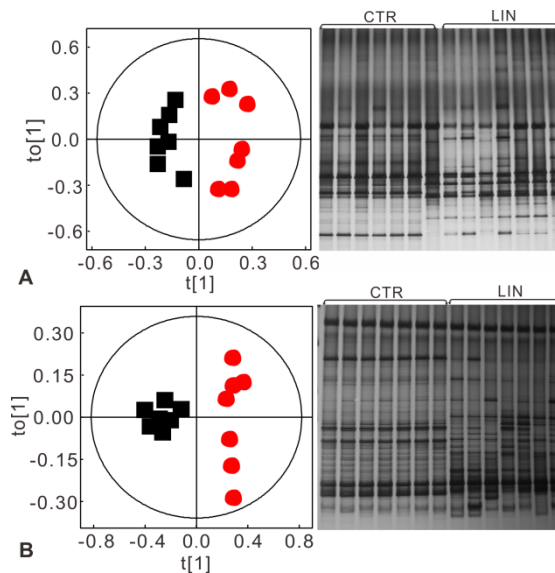

**Figure S6** OPLS-DA score plots (left panel) and PCR-DGGE profiles (right panel) derived from the 16S rRNA gene *Bacteroides* spp. (A) and 16S rRNA gene *Clostridium leptum* (B), indicating

the discrimination between control group (CTR, black) and lincomycin group (LIN, red) rats at day 14.

**Table S1** The primers of V3 region, *Bacteroides* spp. and *Clostridium leptum*.

| Primers            |         | Sequences                       |
|--------------------|---------|---------------------------------|
| V3 region          | 357f_GC | 5'-CGCCCGCCGCGCGCGGGCGGGCGGGCGG |
|                    |         | GGGCACGGGGGGCCTACGGGAGGCAGCA-3' |
|                    | 518r    | 5'-ATTACCGCGGCTGCTGG-3'         |
| <i>Bacteroides</i> | Bfr-R   | 5'-CCGCAAACCTTTCACAACTGACTTA-3' |
| spp.               | Bfr-F   | 5'-CTGAACCAGCCAAGTAGCG-3'       |
| <i>Clostridium</i> | Clept-F | 5'-GCACAAGCAGTGGAGT-3'          |
| <i>leptum</i>      | Clept-R | 5'-CTTCCTCCGTTTTGTCAA-3'        |

**Table S2** PCR amplification system of V3 region, *Bacteroides* spp. and *Clostridium leptum*.

| Reagents                            | 357f_GC<br>(μL) | 518r<br>(μL) | Bfr-R<br>(μL) | Bfr-F<br>(μL) | Clept-F<br>(μL) | Clept-R<br>(μL) | Taq PCR<br>Master Mix<br>(μL) | Templat<br>es (ng) | dd H <sub>2</sub> O                            |
|-------------------------------------|-----------------|--------------|---------------|---------------|-----------------|-----------------|-------------------------------|--------------------|------------------------------------------------|
| V3 region                           | 2               | 2            | 0             | 0             | 0               | 0               | 25                            | 20                 | Add<br>water to<br>total<br>volume<br>of 50 μL |
| <i>Bacteroides</i><br>spp.          | 0               | 0            | 2             | 2             | 0               | 0               | 25                            | 20                 |                                                |
| <i>Clostridium</i><br><i>leptum</i> | 0               | 0            | 0             | 0             | 2               | 2               | 25                            | 20                 |                                                |

**Table S3** PCR program and DGGE analysis condition of V3 region, *Bacteroides* spp. and *Clostridium leptum*.

|              | V3 region of 16S rRNA<br>gene |       | <i>Bacteroides</i> spp. |       | <i>Clostridium leptum</i> |       |
|--------------|-------------------------------|-------|-------------------------|-------|---------------------------|-------|
|              | Temperature                   | Time  | Temperature             | Time  | Temperature               | Time  |
|              | (°C)                          |       | (°C)                    |       | (°C)                      |       |
| Pre-Duration | 95                            | 5 min | 95                      | 4 min | 94                        | 5 min |

|             |         |       |         |       |         |       |
|-------------|---------|-------|---------|-------|---------|-------|
| Duration    | 95      | 1 min | 95      | 30 s  | 94      | 30 s  |
| Anneal      | 55      | 1 min | 52      | 30 s  | 55      | 30 s  |
| Extend      | 72      | 1 min | 72      | 1 min | 72      | 30 s  |
| Post-Extend | 72      | 10min | 72      | 5 min | 72      | 10min |
| DGGE        | 38%-58% |       | 28%-50% |       | 35%-50% |       |
| Voltage     | 70 V    |       | 70 V    |       | 70 V    |       |
| DGGE Time   | 12 h    |       | 13 h    |       | 13 h    |       |

**Table S4**  $^1\text{H}$  NMR data for metabolites in rat urine and faeces.

| keys <sup>a</sup> | Metabolites                  | $\delta$ $^1\text{H}$ (ppm) <sup>b</sup> and multiplicity | $\delta^{13}\text{C}$ | Samples <sup>c</sup> |
|-------------------|------------------------------|-----------------------------------------------------------|-----------------------|----------------------|
| 1                 | Acetone                      | 2.227(s)                                                  | 28.2                  | U                    |
| 2                 | Leucine                      | 3.74(t),0.96(d),0.98(d),1.72(m)                           | 24.7                  | U,F                  |
| 3                 | Valine                       | 0.95(d),1.05(d),2.28(m),3.614(d)                          | 19.6, 20.5            | U,F                  |
| 4                 | Inosine                      | 8.355(s),8.25(s)                                          | 143.0, 149.5          | U                    |
| 5                 | Guanidinoacetate             | 3.80(s)                                                   | 47.5                  | U                    |
| 6                 | Carnitine                    | 3.23(s)                                                   | #                     | U                    |
| 7                 | Xanthosine                   | 7.88(s),5.86(d),4.73(m),4.41(m)                           | 141.0, 90.2           | U                    |
| 8                 | 3-Hydroxyisovalerate         | 1.26(s),2.35(s)                                           | 30.2                  | U                    |
| 9                 | Lactate                      | 1.33(d),4.12(q)                                           | 23.0, 71.3            | U,F                  |
| 10                | $\alpha$ -Hydroxyisobutyrate | 1.35s                                                     | 27.5                  | F                    |
| 11                | Alanine                      | 1.492(d),3.78(q)                                          | 53.0, 19.2            | U,F                  |
| 12                | Hypoxanthine                 | 8.22(s),8.20(s)                                           | 145.2, 147.5          | U                    |
| 13                | Cytidine                     | 7.85(d),6.07(d)                                           | 26.4                  | U                    |
| 14                | <i>N</i> -Acetylglycine      | 2.04(s)                                                   | 24.2                  | U                    |
| 15                | <i>O</i> -Acetylcholine      | 2.13(s)                                                   | 23.8                  | U                    |
| 16                | NADP                         | 9.35(s),9.16(s),8.84(d),8.19(m)                           | #                     | U                    |
| 17                | Acetate                      | 1.92(s)                                                   | 26.1                  | U,F                  |
| 18                | Pyruvate                     | 2.375(s)                                                  | 29.5                  | U,F                  |
| 19                | Succinate                    | 2.407(s)                                                  | 37.3                  | U,F                  |

|    |                             |                                   |                              |     |
|----|-----------------------------|-----------------------------------|------------------------------|-----|
| 20 | Citrate                     | 2.56(d),2.71(d)                   | 48.7, 48.7                   | U   |
| 21 | Methylamine                 | 2.615(s)                          | 27.0                         | U   |
| 22 | Dimethylamine               | 2.729(s)                          | 36.8                         | U   |
| 23 | Trimethylamine              | 2.887(s)                          | 47.4                         | U,F |
| 24 | 3-Hydroxybutyrate           | 2.32(dd),4.16(d t),1.203(d)       | 49.6, 24.5                   | U   |
| 25 | <i>N,N</i> -Dimethylglycine | 2.91(s),3.71(s)                   | 46                           | U,F |
| 26 | Creatinine                  | 3.043(s),4.05(s)                  | 33.1, 59.8                   | U   |
| 27 | Creatine                    | 3.045(s),3.93(s)                  | 38.2, 56.2                   | U,F |
| 28 | Hydroquinone                | 6.81(s)                           | 118.0                        | U   |
| 29 | 2-Oxoglutarate              | 2.454(t),3.02(t)                  | 33.2, 39.0                   | U   |
| 30 | cis-Aconitate               | 3.133(d),5.72(t)                  | 127, 46.7                    | U   |
| 31 | Malate                      | 2.38(dd),2.67(dd),4.295(d)        | 45.5, 98.0                   | U,F |
| 32 | $\alpha$ -Mannose           | 5.195(s)                          | 97.5                         | U   |
| 33 | Isovalerylglycine           | 0.94(m),2.17(d),3.76(d)           | 24, 47.6, 45.5               | U   |
| 34 | Methylmalonate              | 1.25(d),3.18(q)                   | 18.0                         | U   |
| 35 | Choline                     | 4.075(t),3.515(t),3.20(s)         | 58.2, 56.9                   | U,F |
| 36 | Taurine                     | 3.275(t),3.437(t)                 | 49.5, 37.5                   | U   |
| 37 | Acetoacetate                | 2.282(s)                          | 32.3                         | U   |
| 38 | Betaine                     | 3.27(s),3.91(s)                   | 57.0, 68.0                   | U   |
| 39 | Formate                     | 8.46(s)                           | #                            | U,F |
| 40 | <i>N</i> -Acetylglutamate   | 2.228(t),1.99(s)                  | #                            | U   |
| 41 | Benzoate                    | 7.88(d),7.49(t),7.55(t)           | 131.2, 130.0,<br>134.0       | U   |
| 42 | 3-Methyl-2-Oxovalerate      | 1.10(d),0.88(t)                   | 13.2, 16.4                   | U   |
| 43 | Pantothenic acid            | 0.84(s)                           | 21.8                         | U   |
| 44 | Hippurate                   | 3.975(d),7.55(t),7.64(t),7.835(t) | 46.1, 131.5,<br>134.9, 129.9 | U   |
| 45 | Glycine                     | 3.57(s)                           | 44.5                         | U,F |
| 46 | 4-Cresol sulfate            | 2.35(s),7.22(d),7.29(d)           | #                            | U   |
| 47 | NMN                         | 4.48(s),8.90(d),8.97(d),9.29(s)   | #                            | U   |
| 48 | CDP                         | 6.13(d),7.97(d),5.98(d)           | #                            | U   |

|    |                              |                                                     |                     |     |
|----|------------------------------|-----------------------------------------------------|---------------------|-----|
| 49 | CMP                          | 6.14(d),8.10(d),6.01(d)                             | 99.2, 91.5          | U   |
| 50 | ITP                          | 8.51(s),8.24(s)                                     | 149.0               | U   |
| 51 | <i>N</i> -Methyl nicotinate  | 4.45(s),8.83(d),9.13(s)                             | #                   | U   |
| 52 | Dihydroxyacetone             | 4.457(s)                                            | 67.6                | U   |
| 53 | Ttrigonelline                | 4.44(s),8.09(m),8.85(m),9.125(s)                    | 51.3                | U   |
| 54 | trans-Aconitate              | 3.50(s),6.57(m)                                     | 39.2                | U   |
| 55 | Allantoin                    | 5.39(s)                                             | #                   | U   |
| 56 | Fumarate                     | 6.53(s)                                             | 137.5               | U,F |
| 57 | <i>p</i> -Cresol             | 7.14(d),6.835(d),2.255(s)                           | 117.9, 22.1         | U   |
| 58 | Histidine                    | 7.09(s),7.907(s)                                    | 119, 139.1          | U,F |
| 59 | Butyrate                     | 0.90(t),1.56(m),2.15(t)                             | 42.3, 16            | U,F |
| 60 | $\alpha$ -Ketoisocaproate    | 0.92(d),2.06(m),2.61(d)                             | #                   | F   |
| 61 | Isoleucine                   | 0.94(t),1.01(d),1.25(m),1.48(m),<br>1.98(m),3.67(d) | 62.4, 17.2,<br>14.7 | F   |
| 62 | Propionate                   | 1.06(t),2.19(q)                                     | 13.5, 19.2          | U,F |
| 63 | 1,3-Dihydroxyacetone         | 4.42(s),3.57(s)                                     | 67.5                | F   |
| 64 | $\alpha$ -Ketoisovalerate    | 1.13(d),3.02(m)                                     | 18.8                | U,F |
| 65 | Threonine                    | 1.32(d),3.58(d)                                     | 23.5, 63.2          | U,F |
| 66 | Lysine                       | 3.03(t),3.76(t)                                     | 41.0                | U,F |
| 67 | Citrulline                   | 1.57(m),1.87(m),3.15(t),3.75(t)                     | 42.0, 57.9          | F   |
| 68 | Glutamate                    | 2.10(m),2.09(m),2.36(m),3.77(m)                     | #                   | F   |
| 69 | Methionine                   | 2.14(s),2.16(m),2.65(t),3.86(t)                     | 16.0, 31.0,<br>56.7 | F   |
| 70 | TMAO                         | 3.275(s)                                            | 61.5                | U,F |
| 71 | Aspartate                    | 2.68(dd),2.82(dd),3.91(m)                           | 39.3                | F   |
| 72 | Asparagine                   | 2.86(dd),2.96(dd),4.00(m)                           | #                   | F   |
| 73 | $\beta$ -Xylose              | 3.24(dd),4.57(d)                                    | 99.7                | U,F |
| 74 | <i>N</i> -Acety-Glycoprotein | 2.03(s)                                             | 24.5                | F   |
| 75 | Uracil                       | 5.81(d),7.54(d)                                     | 104.2, 146.2        | F   |
| 76 | Tyrosine                     | 6.91(d),7.20(d)                                     | 133.7, 117.0        | U,F |
| 77 | Tryptophan                   | 3.31(dd),3.49(dd),4.06(dd),7.21(t),                 | #                   | F   |

|    |                         |                                                                     |                      |     |
|----|-------------------------|---------------------------------------------------------------------|----------------------|-----|
|    |                         | 7.29(t),7.33(s),7.55(d),.774(d),                                    |                      |     |
| 78 | Phenylalanine           | 3.13(dd),3.29(dd),3.98(dd),7.33(m)<br>7.38(m),7.43(m)               | 38.9, 58.0           | F   |
| 79 | Urocanate               | 6.40(d),7.31(d),7.43(s),7.89(s),                                    | 144.4, 124.0         | F   |
| 80 | Sucrose                 | 5.40(d),4.21(d),4.04(t),3.82(m),<br>3.67(s),3.55(m)                 | 94.5, 78.9,<br>76.2  | F   |
| 81 | 5-Aminovalerate         | 1.62(m),1.65(m),2.24(t),3.02(t)                                     | 38.9, 41.0           | F   |
| 82 | $\alpha$ -Ketoglutarate | 2.45(t),3.01(t)                                                     | 33.4, 38.3           | F   |
| 83 | $\alpha$ -Arabinose     | 5.21(d),5.30(d),4.51(d),4.10(m),<br>3.89(dd)3.66(m)                 | 93.8                 | F   |
| 84 | $\alpha$ -Glucose       | 5.243(d),3.72(dd)3.53(dd)                                           | 94, 73.8             | U,F |
| 85 | Adenine                 | 8.19(s),8.21(s)                                                     | 144.2, 156.2         | F   |
| 86 | $\alpha$ -Galactose     | 5.26(d),4.58(d),4.08(m),3.64(dd)                                    | 94.0, 99.2           | F   |
| 87 | $\beta$ -Arabinose      | 3.53(dd),4.52(d),                                                   | #                    | U,F |
| 88 | $\beta$ -Galactose      | 3.48(dd),3.65(dd),3.93(m),3.71(m),<br>4.59(d),3.74(m)               | 94.0                 | F   |
| 89 | $\alpha$ -Xylose        | 5.25(d),3.52(dd)                                                    | 93.8                 | U,F |
| 90 | Uridine                 | 3.81(d),3.92(d),4.14(q),4.24(t),4.36<br>(t),5.90(d),5.91(d),7.87(d) | 143.9,<br>92.0,104.8 | F   |
| 91 | $\beta$ -Glucose        | 4.657(d),3.235(d),3.733(dd)                                         | 98.9, 75.9,77.5      | U,F |
| 92 | TCA                     | 0.67(s)                                                             | 12.5                 | F   |
| 93 | T $\beta$ MCA           | 0.69(s)                                                             | #                    | F   |
| 94 | DCA                     | 0.72(s)                                                             | 16.1                 | F   |
| 95 | Xanthine                | 7.91(s)                                                             | 144.2                | U,F |
| 96 | Urea                    | 5.78(s)                                                             | #                    | U,F |

<sup>a</sup>Keys: NADP, nicotinamide adenine dinucleotide phosphate; CDP, cytidine diphosphate; CMP, cytidine monophosphate; ITP, inosine triphosphate; TCA, taurocholic acid; T $\beta$ MCA, tauro- $\beta$ -muricholic acid; DCA, deoxycholic acid; TMAO, trimethylamine oxide; NMN, *N*-methylnicotinamide. <sup>b</sup>s, singlet; d, doublet; t, triplet; q, quartet; m, multiplet; dd, doublet of doublets. <sup>c</sup>F, faeces; U, urine; #, not determined.

**Table S5** Significant changes in urine metabolites of the LIN at day 5, day 14 and day 21.

| Urine metabolites           | Correlation coefficients ( $r^a$ ) LIN vs. CTR |              |              |
|-----------------------------|------------------------------------------------|--------------|--------------|
|                             | day 5                                          | day 14       | day 21       |
|                             | $R^2X=0.667$                                   | $R^2X=0.487$ | $R^2X=0.724$ |
|                             | $Q^2=0.908$                                    | $Q^2=0.960$  | $Q^2=0.866$  |
| Fumarate                    | -                                              | 0.79         | -            |
| Taurine                     | -                                              | 0.83         | -            |
| Dimethylamine               | -                                              | 0.79         | -            |
| Lactate                     | 0.79                                           | 0.79         | -            |
| Hippurate                   | -0.90                                          | -0.9         | -0.82        |
| Butyrate                    | -0.78                                          | -0.83        | -0.81        |
| 3-Methyl-2-oxovalerate      | -0.85                                          | -0.89        | -0.77        |
| $\alpha$ -ketoisovalerate   | -0.86                                          | -0.84        | -            |
| Propionate                  | -0.86                                          | -0.90        | -            |
| Acetate                     | -0.79                                          | -            | -            |
| $\alpha$ -mannose           | -                                              | -0.76        | -            |
| $\beta$ -glucose            | -                                              | -0.81        | -            |
| 2-Oxoglutarate              | -                                              | -0.78        | -            |
| Trigonelline                | 0.87                                           | 0.90         | -            |
| Allantoin                   | 0.76                                           | 0.87         | 0.78         |
| Creatine                    | 0.88                                           | 0.76         | 0.79         |
| Creatinine                  | 0.89                                           | 0.76         | -            |
| Lysine                      | 0.76                                           | 0.77         | -            |
| Glycine                     | -                                              | 0.77         | -            |
| N-methyl nicotinamide (NMN) | 0.81                                           | 0.77         | -            |
| Alanine                     | -                                              | -0.82        | -            |
| Hypoxanthine                | -                                              | 0.78         | -            |

<sup>a</sup> Correlation coefficients, positive and negative signs indicate positive and negative correlation in the concentrations, respectively.  $P = 0.05$ ,  $[r] = 0.755$  was used as the corresponding cutoff value of correlation coefficient for the statistical significance based on the discrimination significance, respectively. “-” means the correlation coefficient  $[r]$  is less than the cutoff value.

**Table S6** Significant changes in faecal metabolites of the LIN at day 5, day 14 and day 21.

| Urine metabolites | Correlation coefficients ( $r^a$ ) LIN vs. CTR |              |              |
|-------------------|------------------------------------------------|--------------|--------------|
|                   | day 5                                          | day 14       | day 21       |
|                   | $R^2X=0.964$                                   | $R^2X=0.943$ | $R^2X=0.746$ |
|                   | $Q^2=0.999$                                    | $Q^2=0.999$  | $Q^2=0.987$  |
| $\beta$ -Glucose  | 0.78                                           | 0.79         | 0.77         |
| Uridine           | 0.78                                           | 0.82         | 0.77         |
| Threonine         | 0.76                                           | 0.78         | 0.79         |
| Taurine           | 0.77                                           | 0.80         | 0.76         |
| Choline           | 0.77                                           | 0.79         | 0.82         |
| Glycine           | 0.79                                           | 0.85         | -            |
| Formate           | -0.77                                          | -0.77        | -0.78        |

|                           |       |       |       |
|---------------------------|-------|-------|-------|
| Adenine                   | -0.78 | -0.81 | -0.77 |
| Uracil                    | -0.78 | -0.80 | -0.77 |
| Urocanate                 | -0.77 | -0.79 | -0.78 |
| Tyrosine                  | -0.79 | -0.84 | -0.78 |
| $\beta$ -Galactose        | -0.78 | -0.79 | -     |
| Creatine                  | -0.80 | -0.86 | -     |
| Aspartate                 | -0.78 | -0.86 | -0.77 |
| taurocholic acid (TCA)    | -0.78 | -0.82 | -0.77 |
| $\alpha$ -Ketoisocaproate | -0.77 | -0.81 | -0.78 |
| Acetate                   | -0.86 | -0.92 | -0.8  |
| Propionate                | -0.78 | -0.84 | -0.77 |
| Butyrate                  | -0.78 | -0.82 | -0.80 |
| Isoleucine                | -0.77 | -0.84 | -0.78 |
| $\alpha$ -Ketoisovalerate | -0.78 | -0.87 | -     |
| Phenylalanine             | -0.79 | -0.77 | -0.78 |
| Xanthine                  | -     | -0.82 | -0.79 |

<sup>a</sup> Correlation coefficients, positive and negative signs indicate positive and negative correlation in the concentrations, respectively.  $P = 0.05$ ,  $[r] = 0.755$  was used as the corresponding cutoff value of correlation coefficient for the statistical significance based on the discrimination significance, respectively. “-” means the correlation coefficient  $[r]$  is less than the cutoff value.

**Table S7** Correlation coefficients between the bacterial species from bands and relative concentration of fecal metabolites obtained from samples collected at day 14 post-treatment.

| Bands   | correlation coefficient (r <sup>a</sup> ) |         |          |      |         |                           |         |            |         |          |               |            |           |            |
|---------|-------------------------------------------|---------|----------|------|---------|---------------------------|---------|------------|---------|----------|---------------|------------|-----------|------------|
|         | Choline                                   | Glycine | Tyrosine | TCA  | Uridine | $\alpha$ -ketoisovalerate | Adenine | Asparagine | Acetate | Creatine | Phenylalanine | Propionate | Urocanate | Isoleucine |
| Band 1  | 0.85                                      | -0.80   | -0.90    | 0.85 | 0.77    | -                         | -       | -          | -       | -        | -             | -          | -         | -          |
| Band 2  | -0.80                                     | -0.88   | -        | 0.76 | -       | -0.77                     | -0.96   | 0.90       | -       | -        | -             | -          | -         | -          |
| Band 3  | -                                         | -0.88   | -        | -    | -       | -                         | -       | -          | 0.77    | -0.80    | -             | -          | -         | -          |
| Band 4  | -                                         | -       | -        | -    | -       | 0.81                      | -       | -          | -       | -0.76    | -             | -          | -         | -          |
| Band 5  | -                                         | -       | -        | -    | -       | -                         | -0.89   | -          | 0.80    | -        | -0.81         | -          | -         | -          |
| Band 6  | -                                         | -       | -        | -    | -       | -0.90                     | -       | -          | -       | -        | -             | -          | -         | -          |
| Band 7  | -                                         | -0.78   | -        | -    | -       | -                         | -       | -          | -       | -        | -             | -0.89      | -         | -          |
| Band 8  | -                                         | -       | -        | -    | -       | -                         | -       | -          | -0.77   | -        | -             | -          | -         | -          |
| Band 9  | -                                         | -       | -        | -    | -       | -0.84                     | -       | -          | -       | -        | -             | -          | -         | -          |
| Band 10 | -                                         | -       | -        | -    | -       | 0.90                      | -       | -          | -       | -        | -             | -          | -         | -          |
| Band 11 | -                                         | -       | -        | -    | -       | 0.86                      | -       | -          | -       | -        | -             | -          | -0.91     | -          |
| Band 12 | -                                         | -       | 0.77     | 0.84 | -       | 0.94                      | -       | -          | -       | 0.84     | -             | -          | -         | -0.90      |

<sup>a</sup>Correlation coefficients, post-treatment. positive and negative signs indicate positive and negative correlation in the concentrations, respectively.  $P = 0.05$ ,  $[r] = 0.755$  was used as the corresponding cutoff value of correlation coefficient for the statistical significance based on the discrimination significance, respectively. “-” means the correlation coefficient  $[r]$  is less than the cutoff value.
